# Supplementary material for: Thermodynamics, crystal structure, and characterization of a bio-based nylon 54 monomer
Source: Royal Society of Chemistry journal article supplement (doi:10.1039/c9ce01204d), 2019-01-01
Supplement: c9ce01204d1.pdf [file c9ce01204d1.pdf]

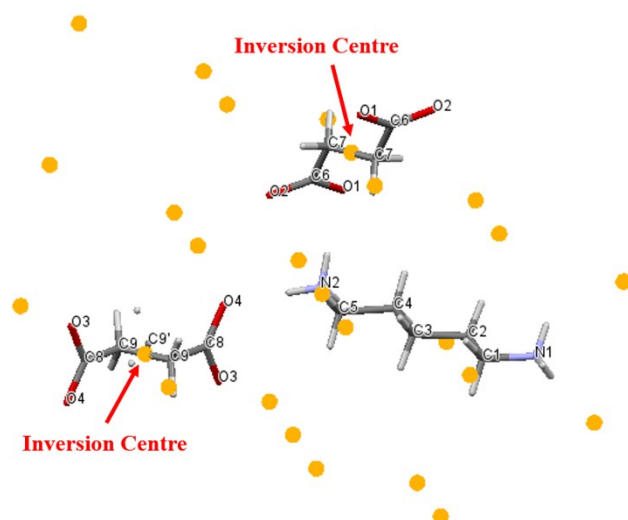

**Fig.S1:** Inversion centers of nylon 54 monomer salt.

**Table S1.** Experimental solubility of nylon 54 monomer salt in different proportions of methanol-water mixtures at different temperatures.

| $x_2$ | $x_1$   |           |         |           |         |           |         |           |
|-------|---------|-----------|---------|-----------|---------|-----------|---------|-----------|
|       | 283.2 K | $10^3$ sd | 293.2 K | $10^3$ sd | 303.2 K | $10^3$ sd | 313.2 K | $10^3$ sd |
| 0.70  | 0.0452  | 0.6673    | 0.0496  | 0.7145    | 0.0536  | 0.3408    | 0.0548  | 0.4134    |
| 0.75  | 0.0426  | 0.8342    | 0.0468  | 0.4120    | 0.0510  | 0.6129    | 0.0533  | 0.5708    |
| 0.80  | 0.0389  | 0.7125    | 0.0438  | 0.8134    | 0.0464  | 0.4301    | 0.0514  | 0.6372    |
| 0.85  | 0.0342  | 0.7459    | 0.0392  | 0.4748    | 0.0403  | 0.5212    | 0.0467  | 0.5899    |
| 0.90  | 0.0267  | 0.5498    | 0.0319  | 0.5901    | 0.0338  | 0.4378    | 0.0412  | 0.4589    |
| 0.95  | 0.0154  | 0.6412    | 0.0216  | 0.6145    | 0.0220  | 0.8609    | 0.0289  | 0.5543    |

**Table S2.** Parameters of the (CNIBS)/Redlich–Kister model for nylon 54 monomer salt at different temperatures.

|             | 283.2 K | 293.2 K | 303.2 K | 313.2 K |
|-------------|---------|---------|---------|---------|
| $B_0$       | 9.185   | 7.583   | -0.137  | 5.518   |
| $B_1$       | -34.836 | -30.778 | -9.300  | -23.940 |
| $B_2$       | 5.712   | 6.383   | 0.445   | 3.862   |
| $B_3$       | 54.653  | 47.251  | 22.640  | 37.883  |
| $B_4$       | -39.542 | -35.054 | -17.983 | -27.350 |
| $10^3$ rmsd | 1.50    | 1.92    | 2.18    | 2.64    |

**Table S3.** Parameters of the modified Apelblat model for nylon 54 monomer salt in pure water.

| solvent    | A      | B         | C      | $10^3$ rmsd |
|------------|--------|-----------|--------|-------------|
| pure water | 17.426 | -3569.732 | -1.311 | 0.0224      |

**Table S4.** The hydrogen-bond geometry ( $\text{\AA}$ ,  $^\circ$ ) of nylon 54 monomer salt.

| D-H $\cdots$ A                    | D-H  | H $\cdots$ A | D $\cdots$ A | D-H $\cdots$ A |
|-----------------------------------|------|--------------|--------------|----------------|
| N1-H1A $\cdots$ O3 <sup>i</sup>   | 0.89 | 1.91         | 2.795(2)     | 179            |
| N1-H1B $\cdots$ O2 <sup>ii</sup>  | 0.89 | 1.93         | 2.769(3)     | 156            |
| N1-H1C $\cdots$ O3 <sup>iii</sup> | 0.89 | 1.91         | 2.798(2)     | 173            |
| N2-H2A $\cdots$ O1                | 0.89 | 1.92         | 2.795(3)     | 166            |
| N2-H2B $\cdots$ O4                | 0.89 | 1.84         | 2.726(3)     | 170            |
| N2-H2C $\cdots$ O1 <sup>iv</sup>  | 0.89 | 1.93         | 2.752(2)     | 153            |

Symmetry codes: ( i )  $1+x, 3/2-y, 1/2+z$ ; ( ii )  $1+x, y, z$ ; ( iii )  $1+x, y, 1+z$ ; ( iv )  $x, 3/2-y, -1/2+z$ .
